20 **Abstract**

21 *Listeria monocytogenes* is a foodborne pathogen that infects the placenta and can cause  
22 pregnancy complications. Listeriosis infections usually occur as sporadic infections, but large  
23 outbreaks are also reported. Virulence from clinical isolates is rarely analyzed due to the large  
24 number of animals required, but this knowledge could help guide the response to an outbreak.  
25 We implemented a DNA barcode system using signature tags that allowed us to efficiently assay  
26 variations in virulence across a large number of isolates. We tested 77 signature-tagged clones of  
27 clinical *L. monocytogenes* strains from 72 infected human placentas and five  
28 immunocompromised patients, all isolated since 2000. These strains were tested for virulence in  
29 a modified competition assay in comparison to the laboratory strain 10403S. We used two *in vivo*  
30 models of listeriosis: the non-pregnant mouse and the pregnant guinea pig. Strains that were  
31 frequently found at high abundance within infected organs were considered “hypervirulent,”  
32 while strains frequently found at low abundance were considered “hypovirulent.” Virulence split  
33 relatively evenly among hypovirulent, hypervirulent, and strains equally virulent to 10403S. The  
34 laboratory strain was found to have an intermediate virulence phenotype, supporting its  
35 suitability for pathogenesis studies. Further, we found that splenic and placental virulence are  
36 closely linked in both guinea pig and mouse models. This suggests that outbreak and sporadic  
37 pregnancy-associated *L. monocytogenes* are not generally more virulent than lab reference  
38 strains. However, some strains did show consistent and reproducible virulence differences,  
39 suggesting that their further study may reveal deeper insights into the biological underpinnings  
40 of listeriosis.

41

## 42 **Introduction**

43           Listeriosis is a foodborne disease that afflicts humans worldwide (1, 2). In the United  
44 States, the Centers for Disease Control estimates it is responsible for approximately 1,600 cases  
45 and 260 deaths per year (3). Most cases occur in predisposed individuals such as  
46 immunocompromised patients, neonates and elderly adults. In those cases the main clinical  
47 manifestations are sepsis, meningoenzephalitis, and death (4). With a mortality rate of ~20% and  
48 recurring foodborne outbreaks, listeriosis remains a significant public health concern (2, 5–7).

49           Disseminated infections are of particular concern in pregnant women, as *Listeria*  
50 *monocytogenes* can spread to the placenta, fetus and/or neonate. Approximately 14% of  
51 clinically recognized cases occur during pregnancy (8). Infection may lead to pregnancy loss,  
52 preterm birth, stillbirth, and life-threatening neonatal infections (9); however, the mechanisms by  
53 which *L. monocytogenes* reaches and breaches the placenta are only just beginning to be  
54 understood using animal models (10). We previously established the pregnant guinea pig model  
55 of listeriosis, which mimics human disease (11). After intravenous inoculation, the maternal  
56 spleen and liver are colonized rapidly, whereas the placenta greatly resists *L. monocytogenes*  
57 infection and is delayed in colonization (12, 13). It is possible that the placenta can only be  
58 infected after robust dissemination of the bacteria throughout maternal organs. Alternatively, or  
59 additionally, it is possible that pregnancy-associated cases of *L. monocytogenes* represent  
60 bacterial strains that are more virulent generally or more specifically adapted for placental  
61 colonization.

62           *L. monocytogenes* typically has a saprophytic lifestyle and is commonly found in soil,  
63 vegetation, and animal feces. Furthermore, it is highly resistant to common antibacterial  
64 precautions taken in food preparation; e.g. cold temperatures, desiccation, and high salt. These

65 factors combine to make *L. monocytogenes* a common food pathogen, but the infectious dose is  
66 high, and so most cases of listeriosis are isolated, sporadic events (8). Indeed, the average adult  
67 ingests  $\sim 10^5$  CFU four times a year, but only a small number of predisposed individuals contract  
68 listeriosis (14). Occasionally, major outbreaks occur in widely distributed foods, leading to  
69 larger numbers of infections (5, 6). It remains an open question whether these outbreak strains  
70 are more virulent than sporadic or lab reference strains.

71         Increasingly, we are learning about how outbreak and hypervirulent pathogen strains  
72 arise and diverge from reference lab strains through the burgeoning field of microbial population  
73 biology. Several studies have analyzed pathogenic strains to understand their evolution and  
74 population structure (15–19), and some assay the virulence of representative clonal clusters  
75 relative to historical reference strains (20). While these studies identify molecular differences  
76 between strains that can account for their origin and altered virulence, actually assaying their  
77 virulence *in vivo* is challenging due to the large number of laboratory animals required. This is  
78 especially true when considering the testing of clinical isolates, with strains numbering in the  
79 scores or hundreds. However, the use of DNA barcodes (signature tags) can allow for  
80 multiplexed analysis of several strains within a single animal. Such studies allow researchers to  
81 understand how virulence has evolved in clinical isolates over time while comparing them to lab  
82 reference strains.

83         Here we characterize the virulence of 77 *L. monocytogenes* strains: 73 isolated from  
84 sporadic clinical cases over a 10-year period and four strains isolated from pregnant women  
85 infected during outbreaks. Sixty-eight sporadic isolates were from pregnancy-associated  
86 listeriosis cases, while five were from non-pregnant immunocompromised patients. We set out to  
87 identify strains with increased and decreased systemic virulence as compared to lab references,

88 using a barcode-based competition assay in pregnant and non-pregnant animal models. We also  
89 assayed for trends in virulence, comparing bacterial burdens across organs to determine which  
90 maternal organs were most likely to be infected in concert with the placenta.

91

## 92 **Materials and Methods**

### 93 *Bacterial strains and culture conditions*

94 The laboratory reference strains are 10403S (erythromycin susceptible) (21), DP-L3903  
95 (erythromycin resistant) (22), and signature-tagged 10403S strains (23). All *L. monocytogenes*  
96 clinical strains used in this study are listed in Supplementary Table S1. Sixty-eight clinical  
97 isolates of *L. monocytogenes* from pregnancy-associated listeriosis that occurred over 10 years  
98 (2000-2010) in 25 states in the US were obtained from the Centers for Disease Control and  
99 Prevention (CDC, Atlanta, GA). Five strains isolated from the blood of immunocompromised  
100 patients at Memorial Sloan-Kettering Cancer Center were a generous gift from Dr. Michael  
101 Glickman. Bacteria were grown in brain heart infusion (BHI, Bacto®, BD) media at 37°C. When  
102 necessary, media were supplemented with the following antibiotics, all purchased from Sigma:  
103 chloramphenicol (7.5µg/mL), nalidixic acid (25µg/mL), streptomycin (200µg/mL) or  
104 erythromycin (2µg/mL).

105

### 106 *Signature tag (DNA barcode) integration in clinical strains*

107 Unique 40-bp signature tags (STs) were inserted into *L. monocytogenes* strain genomes  
108 by site-specific integration from the pPL2 vector as previously described (23). Tagged clinical  
109 strains generated in this study used tags 116, 119, 191, 205, 210, 219, 231, 234, 242, 288 and

110 296. Integrations were confirmed by selection for chloramphenicol resistance and PCR as  
111 previously described (24).

112

113 *Animal infections.*

114 This study was carried out in strict accordance with the recommendations in the Guide  
115 for the Care and Use of Laboratory Animals of the National Institutes of Health. All protocols  
116 were reviewed and approved by the Animal Care and Use Committee at the University of  
117 California, San Francisco (IACUC# AN079731-03A). Individual strains were grown in BHI at  
118 37°C overnight. On the day of infection, 11 differentially-tagged strains were combined at equal  
119 ratios to generate ten input pools. Nine input pools (clinical pools) contained nine clinical and  
120 two 10403S strains; one input pool (control pool) contained 11 differentially-tagged 10403S  
121 strains. 6-8 week old non-pregnant female CD1 mice (Charles River Laboratories) were  
122 inoculated i.v. with a total of  $2 \times 10^5$  CFU pooled bacteria per animal. Pregnant Hartley guinea  
123 pigs (Elm Hill Labs, MA) were inoculated i.v. on gestational day 35 with a total of  $1 \times 10^8$  CFU  
124 pooled bacteria per animal. For the mouse experiments, each clinical pool was injected into five  
125 mice on two separate days for a total of ten mice per pool; the control pool was injected into 15  
126 mice on three separate days. Murine spleens were removed at 48 h.p.i. For the guinea pig  
127 experiments each pool was injected into 2-5 pregnant guinea pigs depending on the number of  
128 fetuses per dam. The total number of guinea pigs injected with clinical pools was 24 with a total  
129 of 96 placentas. The control pool was injected into 3 guinea pigs with a total of 11 placentas.  
130 Guinea pig spleens and placentas were removed at 24 h.p.i. Organs were homogenized in 0.2%  
131 Igepal (Sigma) with a tissue grinder. Aliquots from each output pool were plated on BHI agar  
132 plates containing 25 µg/mL nalidixic acid. CFU per organ were enumerated, and at least  $10^4$

133 colonies from each output pool were scraped off the plates and re-suspended in PBS. Aliquots of  
134 these suspensions were stored at -20°C. Input pools were prepared in the same fashion.

135

### 136 *qPCR*

137 Genomic DNA was extracted from input and output pools using a Gram-positive DNA  
138 purification kit (Epicentre), substituting mutanolysin (5U/μL, Sigma) for lysozyme. Relative  
139 quantification by qPCR for each signature tag was achieved with previously published primer  
140 sets: signature tag-specific forward primers and the common pPL2-395R reverse primer (23). In  
141 addition, one primer set (LIM2 and LIMRE) was directed against *iap*, a gene used as internal  
142 reference (25). All qPCR reactions were performed in a Roche LightCycler® 480 qPCR  
143 machine. Each 20μL reaction contained 10μL SsoAdvanced™ SYBR® Green Universal  
144 Supermix (Bio-Rad), 200nM of each primer, nuclease-free water and template DNA. A total of  
145 20ng template DNA was used for experimental samples. DNA extracted from 10403S-signature  
146 tagged reference strains was used to construct qPCR standard curves for each signature tag  
147 primer set, with template amounts of 100ng, 10ng, 1ng, 0.1ng, and 0.01ng. Cycling conditions  
148 were as follows: 98°C 2', (98°C 5'', 60°C 20'', 68°C 20'') x 40 cycles, followed by a melting  
149 curve cycle (98°C 15'', 60°C 30'', ramp to 98°C in 0.29°C/sec intervals). For each animal  
150 species, duplicate qPCR reactions for the standard curve dilutions, input and output pools, and  
151 template-free controls were run in parallel on a single 384-well plate per primer set.

152 The relative abundance of each signature tag in each output sample was determined in  
153 relation to the reference gene *iap* and the respective input pool. Quantification of cycle numbers  
154 and primer efficiencies were obtained using Lightcycler® Software release 1.5.0 SP3 (Roche).  
155 Relative abundance (RA) values were calculated using the following equation, which accounts

156 for different primer efficiencies (26):  $RA = ((E_{iap}^{Cq_{iap-sample}})/(E_{ST}^{Cq_{ST-sample}}))/((E_{iap}^{Cq_{iap-}}$   
157  $input)/(E_{ST}^{Cq_{ST-input}}))$ , where  $E_{iap}$  and  $E_{ST}$  are the efficiency values calculated from the standard  
158 curves for the *iap* and ST-specific primers.

159

### 160 *Determination of virulence*

161 Within each output pool, the average relative abundance was calculated for each clinical  
162 strain and divided by the average abundance of the two reference strains in the same output pool.  
163 This yielded an output pool-specific, normalized relative abundance for each clinical isolate. The  
164 standard deviation of normalized abundances was calculated using the control group that  
165 consisted of 11 differentially-tagged 10403S strains. A z-score describing the normalized relative  
166 abundance for each strain compared to 10403S was then calculated by subtracting the mean of  
167 the control group relative abundance and dividing by the standard deviation of control group  
168 relative abundance. Strains that were significantly more or less abundant ( $p < 0.01$ ) were  
169 identified according to a normal distribution of z-scores.

170

### 171 *Direct competition assay*

172 6-8 week old female CD1 mice (Charles River) were inoculated i.v. with  $2 \times 10^5$  CFU of  
173 one clinical isolate (erythromycin-susceptible) and 10403S (erythromycin-resistant) at 1:1 ratio.  
174 Bacteria were recovered from spleen at 48 h.p.i. and enumerated, then individual colonies were  
175 tested for differential susceptibility to erythromycin to represent clinical versus 10403S reference  
176 strain. The control group was injected with a 1:1 ratio of two 10403S strains that differed in their  
177 susceptibility to erythromycin. Statistical significance was determined by one-way ANOVA with  
178 Dunnett's multiple comparisons post-test.



179

## 180 **Results**

### 181 *Clinical isolates and in vivo screening method*

182 Our laboratory reference strain 10403S (21) is a streptomycin resistant derivative of *L.*  
183 *monocytogenes* strain 10403, which was originally isolated from a human skin lesion in 1968  
184 (27). 10403S is one of the most widely used strains for experimental investigation and has been  
185 passaged for decades under laboratory conditions (28). We sought to use a DNA strain barcoding  
186 and pooling assay scheme (Fig. 1) to determine how dozens of recent clinical isolates that had  
187 not been previously cultivated in the laboratory differ in virulence from 10403S.

188 We compiled 77 clinical isolates of *L. monocytogenes*: 72 strains from pregnancy-  
189 associated cases of listeriosis collected by the CDC over a 10-year period (2001 to 2011) in 24  
190 US states, and five strains from the blood of immunocompromised non-pregnant patients  
191 undergoing cancer therapy at Memorial Sloan Kettering Cancer Center (MSKCC) in New York  
192 (Fig. 2A and Supplementary Table S1). Almost all strains were from sporadic cases of listeriosis.  
193 Four strains were from three different outbreaks of listeriosis associated with the following  
194 contaminated food sources: (i) Mexican-style cheese in 2005 (placental isolate, serotype 4b)  
195 (29), (ii) turkey deli meat in 2006 (placental and neonatal blood isolates from unrelated mother  
196 and neonate, serotype 4b) (30), and (iii) hog head cheese in 2011 (maternal blood isolate,  
197 serotype 1/2a) (7). Only the strains from the CDC were serotyped. Among these, serotype 4b was  
198 most common, followed by 1/2a and 1/2b, consistent with previous reports (5, 6) (Fig. 2B).

199 We compared the virulence of each clinical strain to 10403S in two animal models: (1)  
200 non-pregnant mice, the standard model for the pathogenesis of systemic listeriosis; and, (2)

201 pregnant guinea pigs, an excellent small animal model for pregnancy-associated listeriosis (11).  
202 In order to minimize the number of animals required for virulence screening, we incorporated a  
203 different, previously characterized DNA barcode into the chromosome of each clinical isolate  
204 (23). Clinical strains were assigned to pools a priori; pools were balanced such that they included  
205 one of each signature tag from the set used, and each included one commonly tagged and one  
206 differentially tagged 10403S strain. Subsequently, each animal was inoculated with pools of  
207 differentially-tagged bacteria. We used a total of 10 pools, each containing 11 strains marked by  
208 unique barcodes. The control pool contained eleven 10403S strains, while each of the remaining  
209 nine pools consisted of nine clinical and two 10403S strains (Pools A-I).

210

### 211 *Profiling systemic virulence in mice and guinea pigs*

212 Mice were infected intravenously (i.v.) with a total of  $2 \times 10^5$  CFU/animal (10  
213 animals/pool). The median bacterial burden in the control spleens 48 hours post-inoculation  
214 (h.p.i) was  $7.2 \times 10^7$  CFU (Fig. 3A). The median CFU in the spleen of mice inoculated with pools  
215 containing clinical strains ranged from  $5.6 \times 10^7$  CFU (Pool D) to  $1.9 \times 10^8$  CFU (Pool G), and did  
216 not differ significantly from the median of the control pool except in two instances: the median  
217 bacterial burden of Pools F and G were 1.8- and 2.6-fold higher than the control pool.

218 Using qPCR with primers specific for each DNA barcode, we determined the average  
219 relative abundance of each clinical strain in comparison to 10403S among the bacteria recovered  
220 from each spleen (Fig. 3B). We observed a range of virulence phenotypes both within and across  
221 the individually analyzed pools. We found that 27 strains were significantly more virulent (z-  
222 score  $>2.0$ , red points in Fig. 3B) and 18 strains were significantly less virulent (z-score  $<-2.0$ ,

223 green points in Fig. 3B) than 10403S. Strains with significantly different virulence were present  
224 in all pools. Most pools contained one or more high and low virulence strains; only one pool did  
225 not contain a low virulence strain (Pool C). Importantly, four sporadic clinical strains (strains 2,  
226 16, 21, and 39; see also Supplementary Table S1) that were present in two different pools  
227 showed similar virulence in their two pools, suggesting that the combination of strains within  
228 each pool did not significantly influence the virulence score of individual strains.

229 We validated our approach by direct competition of select clinical isolates with 10403S  
230 in non-pregnant mice (22). We chose six clinical strains with virulence scores that were either  
231 significantly higher or lower than 10403S in the pooled assay. Mice were inoculated i.v. with one  
232 clinical isolate in combination with 10403S, and their spleens assayed for bacteria at 48 h.p.i.  
233 The strains differed in their susceptibility to erythromycin and were injected at a ratio of 1:1 and  
234 a total CFU of  $2 \times 10^5$ /mouse. Consistent with the results of our screen, the two hypervirulent  
235 strains 13 and 79 were ~5-fold more virulent than 10430S and strain 63 was 2-fold more virulent  
236 (Fig. 3C). In contrast, the hypovirulent strains 19, 39, and 64 were 2-3-fold less virulent than  
237 10403S. These results recapitulated the virulence phenotypes identified in the screen.

238 Next, we infected pregnant Hartley guinea pigs i.v. with  $1 \times 10^8$  CFU of the same pools we  
239 used in the mouse screen, and determined the bacterial burden 24 h.p.i. We chose an earlier time  
240 point than in the mouse screen to avoid the potentially confounding effect of bacterial trafficking  
241 between placenta and spleen at later time points (12). Twenty-four pregnant guinea pigs were  
242 inoculated with clinical pools (2-5 animals/pool); 3 animals were inoculated with the control  
243 pool. The median bacterial burden in the spleens of the control pool was  $2.4 \times 10^6$  CFU, and  
244 ranged from  $3.6 \times 10^6$  CFU (Pool D) to  $3.1 \times 10^7$  CFU (Pool C) in the spleens of animals inoculated  
245 with pools containing clinical isolates, indicating higher overall burdens (Fig. 4A). We

246 determined the average relative abundance of each strain in the guinea pig spleen normalized to  
247 10403S as described above. We identified 22 hypervirulent and 20 hypovirulent strains (Fig.  
248 4B).

249 In both animal models, high- and low-virulence strains were distributed stochastically  
250 across the pools, which we expected with randomized pool assignments. In the guinea pig spleen  
251 the relative abundance of 10403S in the control pool exhibited a wider range than in the mouse  
252 (compare Fig. 3B to 4B). However, the virulence scores of the clinical isolates were similar  
253 between mouse and guinea pig spleen. The scores were concordant for 70% (54/77) of the  
254 strains, and among the discordant strains all but one were either hyper- or hypovirulent in one  
255 animal model and intermediately virulent in the other animal model (Supplementary Table S2).  
256 Only one strain (strain 22, an outbreak strain) was hypervirulent in murine spleen and  
257 hypovirulent in guinea pig spleen.

258

### 259 *Virulence screen in the guinea pig placenta*

260 We evaluated the relative virulence of the clinical isolates in the placentas (n=107) of the  
261 inoculated guinea pigs (8-15 placentas/pool). The median bacterial burden in the control group  
262 was  $8.2 \times 10^5$  CFU per placenta (Fig. 4A). The median of the clinical pools ranged from  $1.7 \times 10^6$   
263 CFU (Pool A) to  $8.4 \times 10^6$  CFU per placenta (Pool C). The range of CFU across all placentas  
264 spanned 3-log ( $3 \times 10^4$  to  $3.8 \times 10^7$  CFU), which is typical for placental infection and likely due to  
265 the stringent bottleneck in placental colonization (12). Consistent with a tight bottleneck we  
266 found the bacterial founding population in the placenta to be significantly smaller than in the

267 spleen. We calculated a median founding population of  $1.1 \times 10^5$  CFU in spleens and 278 CFU in  
268 placentas, respectively (Supplementary Figure S1).

269         Next, we determined the relative abundance of clinical isolates in the guinea pig placenta  
270 in comparison to 10403S. We identified 14 clinical strains with high and 10 clinical strains with  
271 low virulence in the placenta (Fig. 4C). As in the spleen, high and low virulence strains were  
272 distributed stochastically across the pools. Virulence was also assayed by comparing the fraction  
273 of placentas where a strain had a high relative abundance ( $RA > 1$ ) compared to its relative  
274 abundance in guinea pig placentas. We reasoned that hypervirulent strains would be able to  
275 infect more placentas as well as have greater abundance within placentas. In general, the fraction  
276 of infected placentas did correlate strongly with the average relative abundance across placentas  
277 (Fig. 4D). However, this analysis also revealed nine strains with a fraction of infected placentas  
278 equivalent to or higher than that of several strains deemed more virulent by the relative  
279 abundance parameter described above.

280         Comparison of the virulence scores in placenta and/or spleen of both rodents showed a  
281 striking degree of overlap among the three datasets. Only two strains showed a placenta-specific  
282 virulence phenotype (strains 7 and 43). These were hypervirulent in the placenta (by Z-score and  
283 fraction of infected placentas), and intermediately virulent in spleen of guinea pigs and mice. The  
284 five strains that were isolated from immunocompromised, non-pregnant adults all had  
285 intermediate virulence scores in the placenta, and varying virulence scores in the spleen of both  
286 animal models (Supplementary Table S1). The four outbreak strains demonstrated variable  
287 virulence scores across all organs; only one of the outbreak strains scored hypervirulent in all  
288 organs. However, due to the small number of these strains it is not possible to draw any further  
289 conclusions.

290

## 291 **Discussion**

292 Here we report the *in vivo* virulence phenotypes for 73 sporadic and four outbreak  
293 clinical strains of *L. monocytogenes*, 72 of which were isolated from cases of pregnancy-  
294 associated listeriosis. Using a novel DNA barcode approach with qPCR, we identified isolates  
295 with either significantly higher or lower virulence than the standard laboratory reference strain  
296 10403S in systemic listeriosis as well as placental infection. However, no strain showed more  
297 than a 5-fold difference in virulence compared to 10403S. By using signature tagged (barcoded)  
298 strains and qPCR, we found the 77 strains to be an even mix of hypervirulent, hypovirulent and  
299 intermediately virulent. Both outbreak and sporadic clinical isolates were compared, but neither  
300 associated with any virulence phenotype.

301 Our isolates included four strains collected during recent outbreaks of foodborne  
302 listeriosis in the United States (7, 29, 30). In contrast to the bloodstream isolates from septicemic  
303 patients, these isolates were each associated with otherwise healthy pregnancies. We observed  
304 that one of these strains was highly virulent in all three assays, while the remaining three showed  
305 varied but overall moderate virulence patterns (Supplemental Table 1, Strains 13, 21, 22, 23). It  
306 is tempting to assume that outbreaks are due to increases in virulence. However, in addition to  
307 the bacterial virulence, independent factors such as ingested dose, maternal genetics and overall  
308 maternal health may dramatically influence the outcome of exposure to *L. monocytogenes*.  
309 Evaluating the effect of any of these factors would require additional studies, potentially  
310 including prospective studies to fully characterize the maternal status correlated with placental  
311 infection and pregnancy outcomes.

312 Population biology studies of pathogens have focused primarily on how virulence  
313 evolved, outbreaks arose, and antibiotic resistance spread (15–18, 31). Fewer studies have sought  
314 to compare the *in vivo* virulence of clinical strains over a period of time. In part, this is due to the  
315 high cost of animal research and the need for several animals per strain. In order to circumvent  
316 this, we developed a DNA barcode system. Previous uses of signature tagged strains in *L.*  
317 *monocytogenes* have involved understanding bottlenecks in disseminations and alanine  
318 suppression screening to investigate virulence factors (13, 23). Here, it allowed for the  
319 simultaneous use of clinical strains in order to reduce the number of animals required to assess  
320 virulence. This technique could be even more valuable in larger, more expensive animal models,  
321 such as nonhuman primates. Additionally, the ability to test resistance to food processing  
322 techniques could be streamlined by using signature tagged libraries of clinical strains.

323 We observed a larger variation in the distribution of strain abundances in the guinea pig  
324 placenta than in either of the spleen datasets. This is consistent with the previously reported  
325 bottleneck for placental infection (12, 13); therefore, we determined the founding population in  
326 the guinea pig placenta. We calculated approximately 1/360,000 bacteria from the inoculum will  
327 infect the placenta. Many of the hypervirulent strains both had a higher abundance in the  
328 placenta and infected a greater fraction of placentas. Therefore, in assessing virulence for organs  
329 in which an infection bottleneck exists, CFU burden alone are an incomplete measure, and the  
330 fraction of organs infected should also be evaluated.

331 Clinical strains had similar virulence between their spleens and placentas. *L.*  
332 *monocytogenes* strains have been analyzed by multilocus strain typing and organized into clonal  
333 clusters (18). The most prevalent clonal clusters in bacteremia were also present in placental and  
334 neuroinvasive strains. This suggests that successful placental colonization requires a robust

335 systemic infection. It does not mean, however, that *L. monocytogenes* has not evolved  
336 specialized determinants to infect the placenta. Guinea pig models have identified genes required  
337 for successful colonization of the placenta compared to the liver (32). And outbreak strains in  
338 some pathogens have been traced to novel virulence factors through recombination or horizontal  
339 gene transfer (33). A notable example is the EHEC O157:H7 strain that gained shiga toxin genes  
340 via horizontal gene transfer (34). Further, *Streptococcus* species have novel virulence factors  
341 associated with accessory regions; that is, genes not found in the core genome (35). However, *L.*  
342 *monocytogenes* has been reported to have a highly conserved and syntenic genome (36). Out of  
343 the large number of clonal clusters, only the CC4 strains have so far demonstrated an increase in  
344 neuronal and placental infection without an increase in splenic or hepatic infection, likely due to  
345 a novel carbon metabolism operon (20). We only observed one instance of a decreased splenic  
346 virulence and increased placental virulence. Interestingly, this strain, LS22, was isolated from  
347 neonatal blood during a deli meat outbreak (30). However, another isolate from the same  
348 outbreak but isolated from a placenta (LS23) did not show this phenotype. Both strains were  
349 serotype 4b, which is more commonly associated with clinical cases (37).

350 Our lack of strains with increased placental virulence compared to maternal organs may  
351 be due to our sample size of clinical isolates being  $\sim 1/100^{\text{th}}$  of that initially used by Maury et al.,  
352 (20); although that work assayed a similar number of clones for virulence, they were chosen as  
353 representative of the starting population's clonal clusters. The tight linkage between maternal and  
354 placental virulence and the fact that human placental infection provides no epidemic selective  
355 advantage suggests that placenta-specific strains are likely rare.

356 Our survey of virulence in both sporadic and outbreak strains from pregnancy-associated  
357 listeriosis cases shows that American *L. monocytogenes* isolates are evenly spread around the



358 long-used laboratory strain 10403S, with some more and some less virulent in animal models.  
359 This validates the use of that laboratory strain in pathogenesis studies. Further, the lack of clear  
360 difference between outbreak and sporadic strains suggest that listerial epidemiology is not a  
361 function of pathogen virulence but of other factors, likely related to individual behaviors/health  
362 and food production practices. Finally, we found a tight coupling between maternal bacterial  
363 burden and placental infection, suggesting that a primary driver of placental susceptibility is the  
364 degree of maternal infection. The DNA barcode approach is a powerful and cost-efficient way to  
365 assess the performance of large numbers of diverse clones in animal models.

366

## 367 **Acknowledgements**

368 We are grateful to Lewis Graves (CDC) who provided the *L. monocytogenes* strains. This work  
369 was supported by NIH R01AI084928 (A.I.B), Burroughs Wellcome Fund (A.I.B), NIH  
370 F32AI102491 (H.A.M), and NIH F32AI120676 (D.E.L).

371

## 372 **Figure Legends**

373 **Fig. 1. Experimental design.** Signature-tagged *L. monocytogenes* strains were pooled and  
374 injected i.v. into pregnant guinea pigs or non-pregnant mice. Each pool contained 11 barcoded  
375 strains; 9 clinical and 2 laboratory reference strains (10403S) in the clinical pools, and 11  
376 laboratory reference strains in the 10403S pool. For each organ set (guinea pig spleen, guinea pig  
377 placenta, mouse spleen), virulence scores were assigned to each strain based on the average  
378 relative abundance in the infected organs in comparison to the laboratory reference strains.

379

380 **Fig. 2. Clinical isolates. A) Pregnancy associated *L. monocytogenes* strains (n=72) from 25 US**  
381 **states were collected by the CDC between 2000-2010. Most were associated with sporadic cases**  
382 **of listeriosis during pregnancy and were isolated from placental tissue (n=68; pregnancy,**  
383 **sporadic). Four strains were associated with listeriosis outbreaks in the US (n=4; pregnancy,**  
384 **outbreak). These 4 strains were isolated from placenta (n=2), maternal blood (n=1), and neonatal**  
385 **blood (n=1). Five strains were isolated from immunocompromised patients at MSKCC (n=5;**  
386 **immunocompromised). B) Serotype distribution of pregnancy-associated strains.**

387

388 **Fig. 3. Virulence screen of clinical *L. monocytogenes* isolates in murine spleen.** CD1 mice  
389 (non-pregnant) were infected i.v. with bacterial pools containing differentially-tagged *L.*  
390 *monocytogenes* strains at equal ratios (total of 10 pools). Pools A-I contained nine clinical and  
391 two 10403S strains per pool; the 10403S pool contained 11 laboratory reference strains.  
392 Statistically significant differences in splenic bacterial burden compared to the control group  
393 were determined using one-way ANOVA with Dunnett's multiple comparisons post test. \*\*\*,  
394  $p < 0.0001$ . \*\*,  $p < 0.01$ . \*,  $p < 0.05$ . **A) Bacterial burden in murine spleen 48 h.p.i. with  $2 \times 10^5$  CFU**  
395 **per pool. Pools A-I: n=10 mice/pool; 10403S pool: n=15 mice. Each circle represents the**  
396 **bacterial burden in one spleen, and each pool is represented by a different color. Red lines**  
397 **represent median. B) The average relative abundance of each strain in mouse spleen was**  
398 **quantified by qPCR. To accurately compare values across pools, the average relative abundance**  
399 **for each isolate was then normalized to the average of the reference strain in each pool.**  
400 **Significance z-scores were calculated for the deviation from the range expected based on the**  
401 **10403S pool (black circles). Blue circles indicate isolates with virulence similar to 10403S**

402 (intermediate virulence). Red and green circles indicate isolates with significantly higher and  
403 lower virulence, respectively. C) CD1 mice were infected with one erythromycin-resistant  
404 10403S strain and one erythromycin-susceptible clinical isolate at a 1:1 ratio. The clinical  
405 isolates were chosen based on their virulence scores in Fig 3B: 3 hyper- (red circles) and 3 hypo-  
406 (green circles) virulent strains. Competitive indices (isolate/10403S) were calculated for bacteria  
407 recovered from the spleen 48 h.p.i. The control group was infected with two 10403S strains that  
408 differed in their susceptibility to erythromycin (10403S/E, black circles). Each group contained 5  
409 mice from 2 separate experiments.

410

411 **Fig. 4. Virulence screen of clinical *L. monocytogenes* isolates in pregnant guinea pigs (spleen**  
412 **and placenta).** Pregnant Hartley guinea pigs were infected i.v. with pools containing  
413 differentially-tagged *L. monocytogenes* strains (see Fig. 3). Statistically significant differences  
414 compared in bacterial burden in spleen and placenta to the control group were determined using  
415 one-way ANOVA with Dunnett's multiple comparisons post-test. \*\*\*,  $p < 0.0001$ . \*\*,  $p < 0.01$ . \*,  
416  $p < 0.05$ . A) Bacterial burden in guinea pig spleen and placenta 24 h.p.i. with  $10^8$  CFU per pool.  
417 The total number of guinea pigs was 27 with a total of 107 placentas. Number of placentas in  
418 each pool: A=12; B=8; C=9; D=8; E=15; F=10; G=14; H=12; I=8, 10403S=11. Each filled circle  
419 represents the bacterial burden in one placenta, and each pool is represented by a different color.  
420 Red lines represent median placental CFU. Empty circles represent the median bacterial burden  
421 in spleens from each pool. B) The average relative abundance of each strain in guinea pig spleen  
422 was quantified by qPCR and significance z-scores were calculated. Black dots indicate 10403S  
423 strains. Blue circles indicate isolates with virulence similar to 10403S (intermediate virulence).  
424 Red and green circles indicate isolates with significantly higher and lower virulence,

425 respectively. **C)** Average relative abundance of each strain in guinea pig placenta quantified and  
426 calculated as described above. **D)** Correlation of relative abundance of each strain in the placenta  
427 with the fraction of placentas they infected at higher relative abundance than their inoculant  
428 (RA>1.0). Gray dashed outline encircles isolates not identified as highly virulent by relative  
429 abundance alone, but with infected fractions comparable to high virulence isolates. Color coding  
430 corresponds to panel C.  
431

432 **Supplementary Information:**

433

434 **Table S1. Strains used in this study.**

435 <sup>1</sup>Strain ID designated by outside laboratory

436 <sup>1</sup>Date received at CDC

437 <sup>3</sup>State where isolate was originally acquired

438 <sup>4</sup>As determined at CDC

439 <sup>5</sup>strain number used in this study

440 <sup>6</sup>Shading indicates significant z-scores. Red, z-score >2.0. Green, z-score <-2.0

441 n/a, not applicable

442 nd, not determined

443

444 **Table S2. Comparison of splenic virulence scores between mouse and guinea pig.**

445

446 **Supplementary Figure S1.**

447 **Fig. S1. Quantification of the founding population in spleens and placentas of guinea pigs.**

448 Pregnant Hartley guinea pigs (spleens n = 3; placentas n = 11) were infected i.v. with pools  
449 containing differentially-tagged in the same 10403S strain. The founding population (Nb) was  
450 calculated by the harmonic mean of the tag abundance based in the organ. A Mann-Whitney test  
451 of the the founding populations in spleens and placentas found a statistically significant  
452 difference (\*\**P*-value = 0.0055). Filled circles represent the amount of bacteria that founded the  
453 infection of the organ in CFU/mL and red bars represent the median.

454 **Supplemental method for estimating the founding population in each organ:**

455 Abundance of the signature tagged bacteria was determined by using qPCR and CFU/organ data.

456 For each signature tag in each organ, the amount of DNA in ng was calculated by a standard

457 curve using the  $C_p$  values and known ng amounts. The frequency of abundance of signature tags

458 was determined by dividing the calculated ng of DNA for each tag over the summed total ng for

459 all signature tags in a given organ. The frequencies were then multiplied by the amount of

460 CFU/organ at the time of dissection. Finally, the harmonic mean was calculated for each organ to

461 find the effective population.

462

463

464 **References**

- 465 1. Chenal-Francois V, Lopez J, Cantinelli T, Caro V, Tran C, Leclercq A, Lecuit M, Brisse S. 2011.  
466 Worldwide Distribution of Major Clones of *Listeria monocytogenes*. *Emerg Infect Dis* 17:1110–  
467 1112.
- 468 2. de Noordhout CM, Devleeschauwer B, Angulo FJ, Verbeke G, Haagsma J, Kirk M, Havelaar A,  
469 Speybroeck N. 2014. The global burden of listeriosis: a systematic review and meta-analysis.  
470 *Lancet Infect Dis* 14:1073–1082.
- 471 3. Scallan E, Hoekstra RM, Angulo FJ, Tauxe RV, Widdowson M-A, Roy SL, Jones JL, Griffin PM. 2011.  
472 Foodborne Illness Acquired in the United States—Major Pathogens. *Emerg Infect Dis* 17:7–15.
- 473 4. Lorber. 1997. Listeriosis. *Clin Infect Dis* 24:541–541.
- 474 5. Gottlieb SL, Newbern EC, Griffin PM, Hoekstra RM, Baker NL, Hunter SB, Sobel J. Multistate  
475 Outbreak of Listeriosis Associated with Cantaloupe | NEJM. *Clin Infect Dis* 42:29–36.
- 476 6. Linnan MJ, Mascola L, Lou XD, Goulet V, May S, Salminen C, Hird DW, Yonekura ML, Hayes P,  
477 Weaver R. 1988. Epidemic listeriosis associated with Mexican-style cheese. *N Engl J Med* 319:823–  
478 828.
- 479 7. Centers for Disease Control and Prevention (CDC). 2011. Outbreak of invasive listeriosis associated  
480 with the consumption of hog head cheese--Louisiana, 2010. *MMWR Morb Mortal Wkly Rep*  
481 60:401–405.
- 482 8. Centers for Disease Control and Prevention (CDC). 2013. Vital signs: *Listeria* illnesses, deaths, and  
483 outbreaks--United States, 2009-2011. *MMWR Morb Mortal Wkly Rep* 62:448–452.

- 484 9. Lamont RF, Sobel J, Mazaki-Tovi S, Kusanovic JP, Vaisbuch E, Kim SK, Uldbjerg N, Romero R. 2011.  
485 Listeriosis in human pregnancy: a systematic review. *J Perinat Med* 39:227–236.
- 486 10. Lowe DE, Robbins JR, Bakardjiev AI. 2018. Animal and human tissue models of vertical *Listeria*  
487 *monocytogenes* transmission and implications for other pregnancy-associated infections. *Infect*  
488 *Immun* IAI.00801-17.
- 489 11. Bakarjdiev AI, Stacy BA, Fisher SJ, Portnoy DA. Listeriosis in the pregnant guinea pig: a model of  
490 vertical transmission. - PubMed - NCBI. *Infect Immun* 72:489–497.
- 491 12. Bakardjiev AI, Theriot JA, Portnoy DA. 2006. *Listeria monocytogenes* traffics from maternal organs  
492 to the placenta and back. *PLoS Pathog* 2:e66.
- 493 13. Melton-Witt JA, Rafelski SM, Portnoy DA, Bakardjiev AI. 2012. Oral infection with signature-tagged  
494 *Listeria monocytogenes* reveals organ-specific growth and dissemination routes in guinea pigs.  
495 *Infect Immun* 80:720–732.
- 496 14. Notermans S, Dufrenne J, Teunis P, Chackraborty T. 1998. Studies on the risk assessment of *Listeria*  
497 *monocytogenes*. *J Food Prot* 61:244–248.
- 498 15. Piffaretti JC, Kressebuch H, Aeschbacher M, Bille J, Bannerman E, Musser JM, Selander RK, Rocourt  
499 J. 1989. Genetic characterization of clones of the bacterium *Listeria monocytogenes* causing  
500 epidemic disease. *Proc Natl Acad Sci* 86:3818–3822.
- 501 16. Chen Y, Zheng W, Knabel SJ. 2007. Multi-Virulence-Locus Sequence Typing Identifies Single  
502 Nucleotide Polymorphisms Which Differentiate Epidemic Clones and Outbreak Strains of *Listeria*  
503 *monocytogenes*. *J Clin Microbiol* 45:835–846.



- 504 17. Mereghetti L, Lanotte P, Savoye-Marczuk V, Marquet-Van Der Mee N, Audurier A, Quentin R. 2002.  
505 Combined Ribotyping and Random Multiprimer DNA Analysis To Probe the Population Structure of  
506 *Listeria monocytogenes*. *Appl Environ Microbiol* 68:2849–57.
- 507 18. den Bakker HC, Fortes ED, Wiedmann M. 2009. Multilocus Sequence Typing of Outbreak-  
508 Associated *Listeria monocytogenes* Isolates to Identify Epidemic Clones. *Foodborne Pathog Dis*  
509 7:257–265.
- 510 19. Ragon M, Wirth T, Hollandt F, Lavenir R, Lecuit M, Monnier AL, Brisse S. 2008. A New Perspective  
511 on *Listeria monocytogenes* Evolution. *PLOS Pathog* 4:e1000146.
- 512 20. Maury MM, Tsai Y-H, Charlier C, Touchon M, Chenal-Francisque V, Leclercq A, Criscuolo A, Gaultier  
513 C, Roussel S, Brisabois A, Disson O, Rocha EPC, Brisse S, Lecuit M. 2016. Uncovering *Listeria*  
514 *monocytogenes* hypervirulence by harnessing its biodiversity. *Nat Genet* 48:308.
- 515 21. Bishop DK, Hinrichs DJ. 1987. Adoptive transfer of immunity to *Listeria monocytogenes*. The  
516 influence of in vitro stimulation on lymphocyte subset requirements. *J Immunol Baltim Md* 1950  
517 139:2005–2009.
- 518 22. Auerbuch V, Lenz LL, Portnoy DA. 2001. Development of a competitive index assay to evaluate the  
519 virulence of *Listeria monocytogenes* actA mutants during primary and secondary infection of mice.  
520 *Infect Immun* 69:5953–5957.
- 521 23. Melton-Witt JA, McKay SL, Portnoy DA. 2012. Development of a single-gene, signature-tag-based  
522 approach in combination with alanine mutagenesis to identify listeriolysin O residues critical for  
523 the in vivo survival of *Listeria monocytogenes*. *Infect Immun* 80:2221–2230.

- 524 24. Lauer P, Chow MYN, Loessner MJ, Portnoy DA, Calendar R. 2002. Construction, characterization,  
525 and use of two *Listeria monocytogenes* site-specific phage integration vectors. *J Bacteriol*  
526 184:4177–4186.
- 527 25. Hein I, Klein D, Lehner A, Bubert A, Brandl E, Wagner M. 2001. Detection and quantification of the  
528 *iap* gene of *Listeria monocytogenes* and *Listeria innocua* by a new real-time quantitative PCR assay.  
529 *Res Microbiol* 152:37–46.
- 530 26. Bustin SA, Mueller R. 2005. Real-time reverse transcription PCR (qRT-PCR) and its potential use in  
531 clinical diagnosis. *Clin Sci Lond Engl* 1979 109:365–379.
- 532 27. Edman DC, Pollock MB, Hall ER. 1968. *Listeria monocytogenes* L forms. I. Induction maintenance,  
533 and biological characteristics. *J Bacteriol* 96:352–357.
- 534 28. Becavin C, Bouchier C, Lechat P, Archambaud C, Creno S, Gouin E, Wu Z, Cossart P. 2014.  
535 Comparison of Widely Used *Listeria monocytogenes* Strains EGD, 10403S, and EGD-e Highlights  
536 Genomic Differences Underlying Variations in Pathogenicity. *MBio* 5:e00969-14.
- 537 29. MacDonald PDM, Whitwam RE, Boggs JD, MacCormack JN, Anderson KL, Reardon JW, Saah JR,  
538 Graves LM, Hunter SB, Sobel J. 2005. Outbreak of Listeriosis among Mexican Immigrants as a  
539 Result of Consumption of Illicitly Produced Mexican-Style Cheese. *Clin Infect Dis* 40:677–682.
- 540 30. Gottlieb SL, Newbern EC, Griffin PM, Graves LM, Hoekstra RM, Baker NL, Hunter SB, Holt KG,  
541 Ramsey F, Head M, Levine P, Johnson G, Schoonmaker-Bopp D, Reddy V, Kornstein L, Gerwel M,  
542 Nsubuga J, Edwards L, Stonecipher S, Hurd S, Austin D, Jefferson MA, Young SD, Hise K, Chernak  
543 ED, Sobel J. 2006. Multistate Outbreak of Listeriosis Linked to Turkey Deli Meat and Subsequent  
544 Changes in US Regulatory Policy. *Clin Infect Dis* 42:29–36.

- 545 31. Leavis HL, Bonten MJ, Willems RJ. 2006. Identification of high-risk enterococcal clonal complexes:  
546 global dispersion and antibiotic resistance. *Curr Opin Microbiol* 9:454–460.
- 547 32. Faralla C, Rizzuto GA, Lowe DE, Kim B, Cooke C, Shioh LR, Bakardjiev AI. 2016. InIP, a New  
548 Virulence Factor with Strong Placental Tropism. *Infect Immun* 84:3584–3596.
- 549 33. Juhas M. 2015. Horizontal gene transfer in human pathogens. *Crit Rev Microbiol* 41:101–108.
- 550 34. Laing CR, Zhang Y, Gilmour MW, Allen V, Johnson R, Thomas JE, Gannon VPJ. 2012. A Comparison  
551 of Shiga-Toxin 2 Bacteriophage from Classical Enterohemorrhagic *Escherichia coli* Serotypes and  
552 the German *E. coli* O104:H4 Outbreak Strain. *PLOS ONE* 7:e37362.
- 553 35. Blomberg C, Dagerhamn J, Dahlberg S, Browall S, Fernebro J, Albiger B, Morfeldt E, Normark S,  
554 Henriques-Normark B. 2009. Pattern of Accessory Regions and Invasive Disease Potential in  
555 *Streptococcus pneumoniae*. *J Infect Dis* 199:1032–1042.
- 556 36. den Bakker HC, Cummings CA, Ferreira V, Vatta P, Orsi RH, Degoricija L, Barker M, Petrauskene O,  
557 Furtado MR, Wiedmann M. 2010. Comparative genomics of the bacterial genus *Listeria*: Genome  
558 evolution is characterized by limited gene acquisition and limited gene loss. *BMC Genomics*  
559 11:688.
- 560 37. McLauchlin J. 1990. Distribution of serovars of *Listeria monocytogenes* isolated from different  
561 categories of patients with listeriosis. *Eur J Clin Microbiol Infect Dis Off Publ Eur Soc Clin Microbiol*  
562 9:210–213.

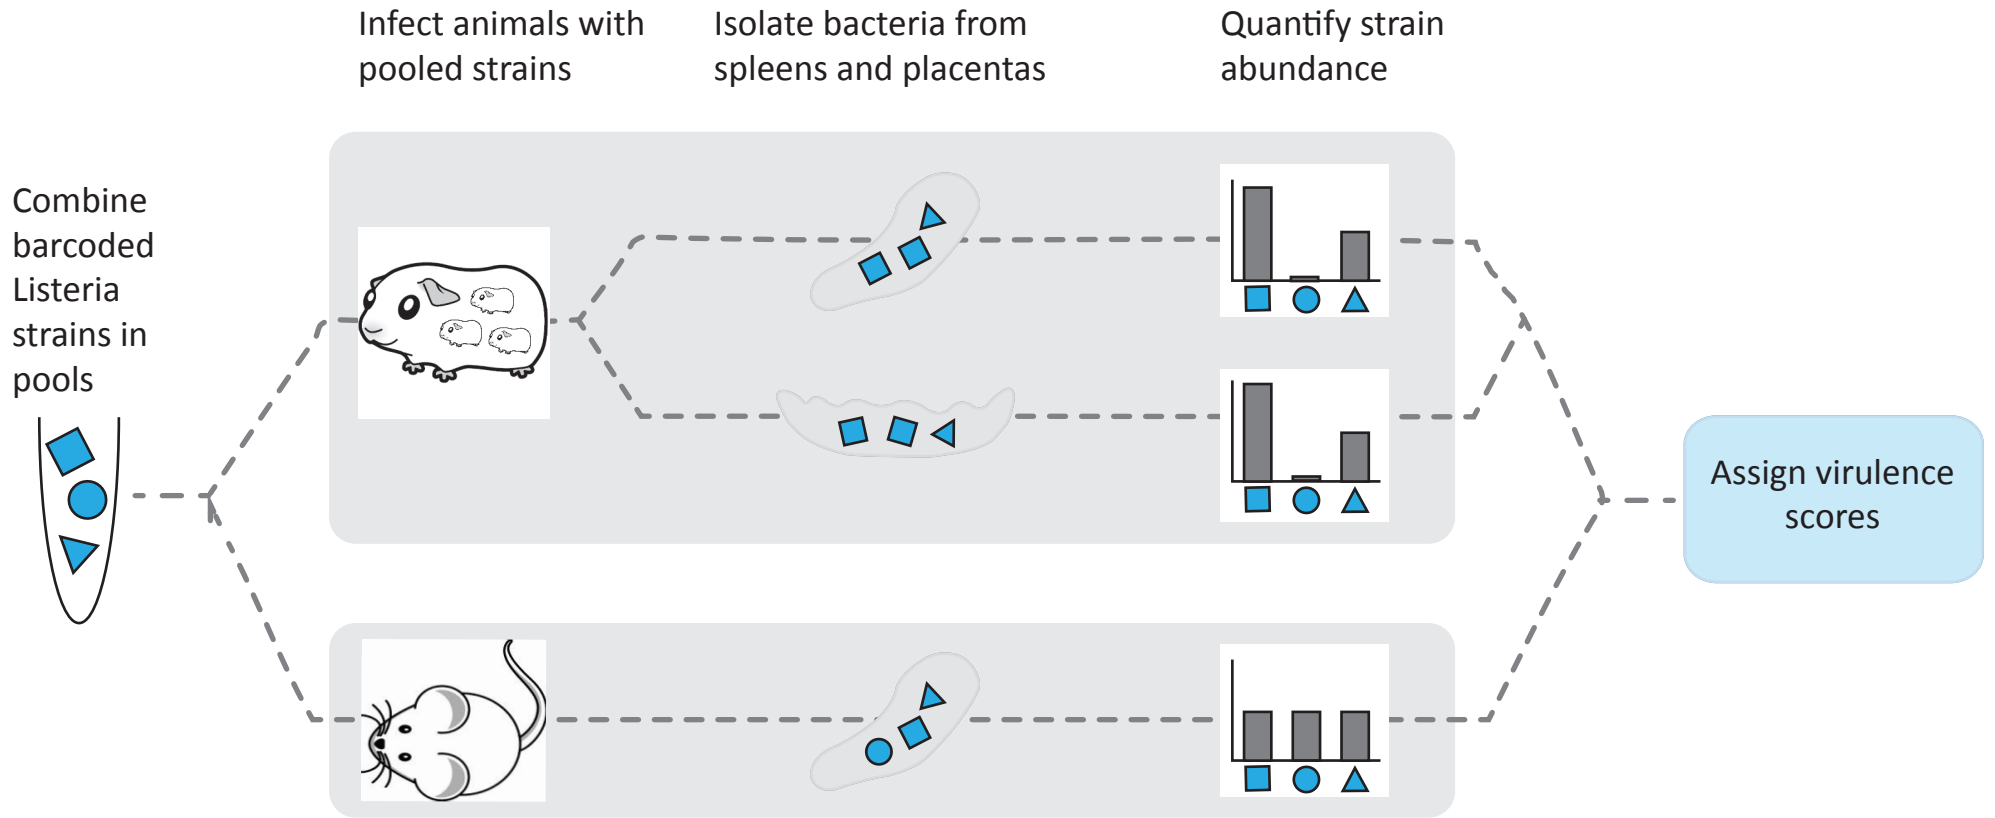

Fig. 2

A

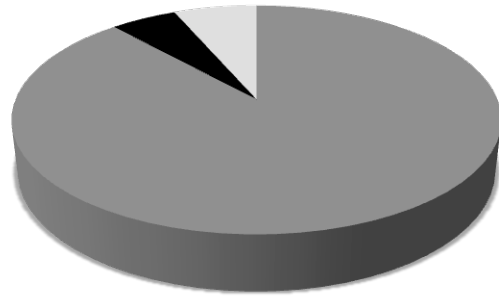

| host | Pregnancy sporadic | Pregnancy outbreak | Immuno-compromised |
|------|--------------------|--------------------|--------------------|
| n    | 68                 | 4                  | 5                  |

B

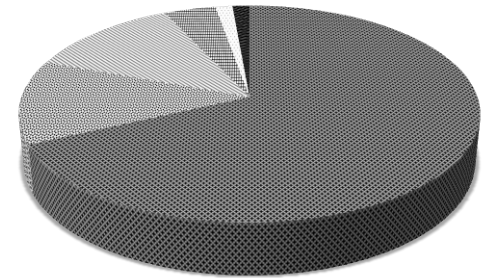

| Sero type | 4b | 1/2a | 1/2b | 4c | 1/2c | 3b |
|-----------|----|------|------|----|------|----|
| n         | 49 | 9    | 9    | 3  | 1    | 1  |

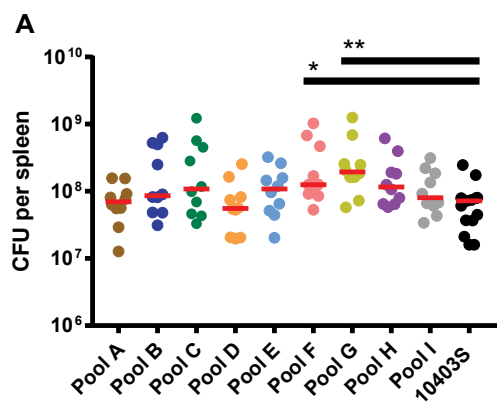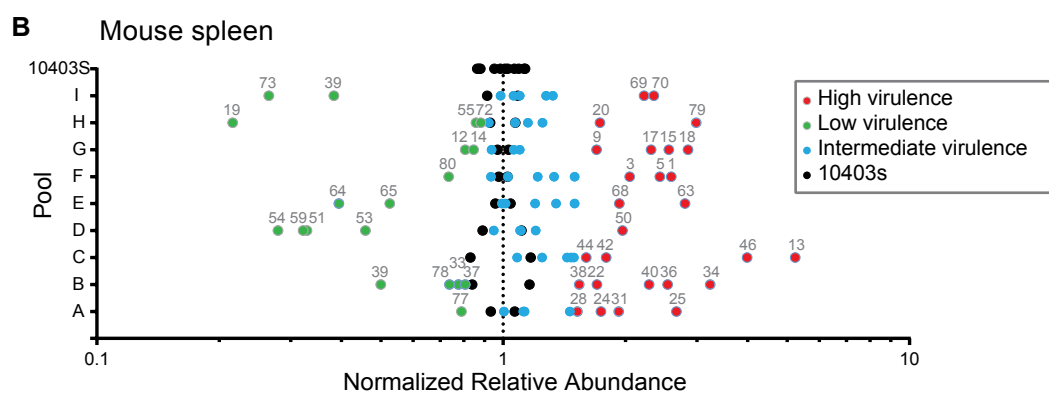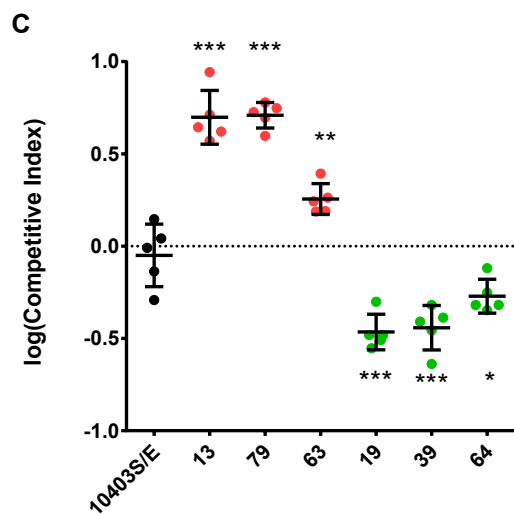

**A**

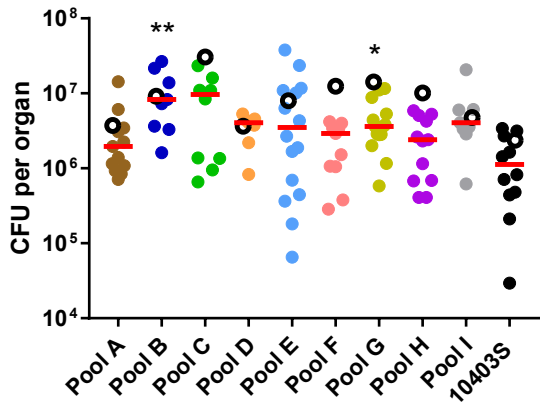

**B** Guinea pig spleen

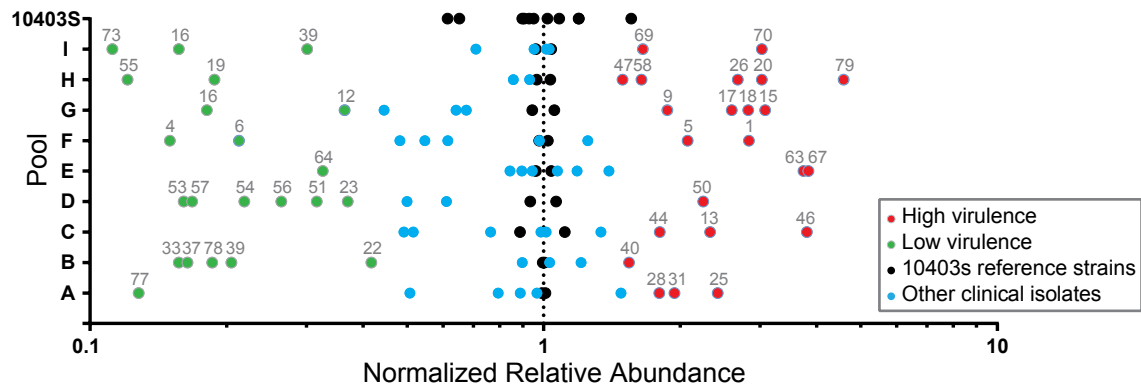

**C** Guinea pig placenta

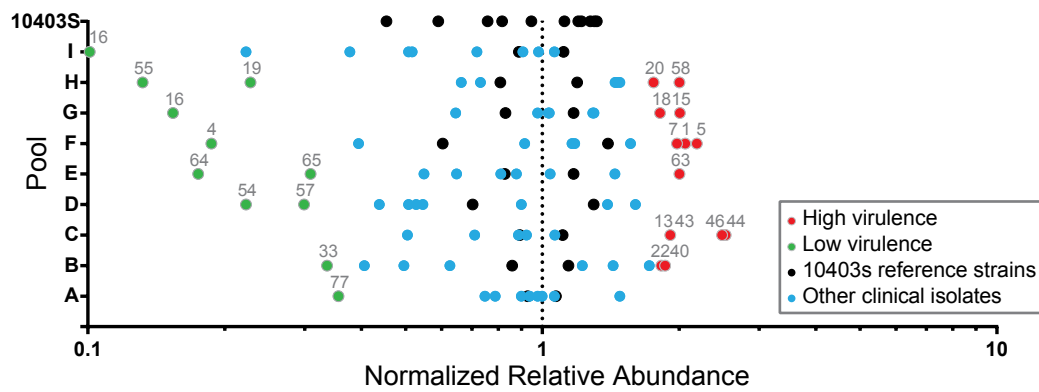

**D**

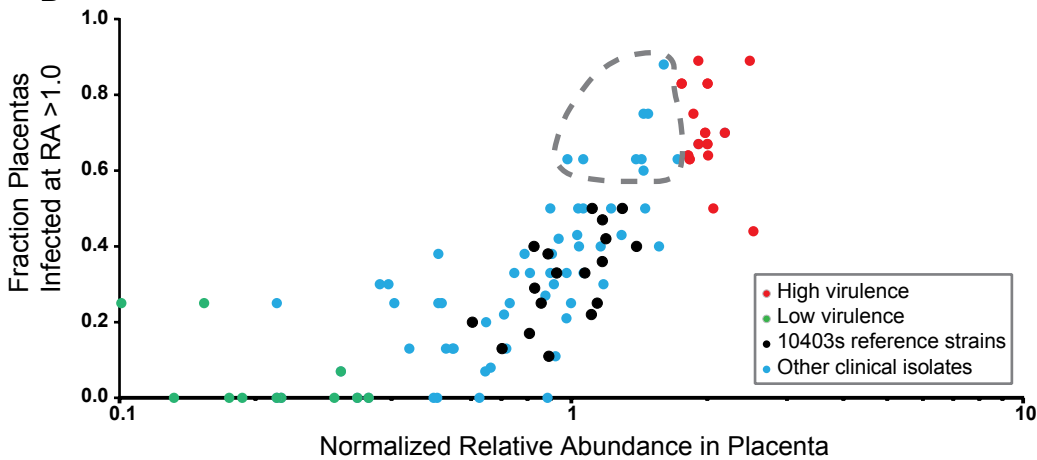

Source: https://www.biorxiv.org/content/10.1101/337444v1.full.pdf
